# Supplementary material
Source: Springer Nature journal article supplement (https://www.springermedizin.de/resource/supplementary/12936_2014_3221_MOESM2_ESM.pdf/9545322)

1 2 3 4 5 6 7 8 9 10 11 12 13 14 15 16 17 18 19 20 21  
M F V M O F V M O F V M O F V M O F V M O

-ve ctrl

Pf + ve ctrl

Pv +ve ctrl

BK095

BK010

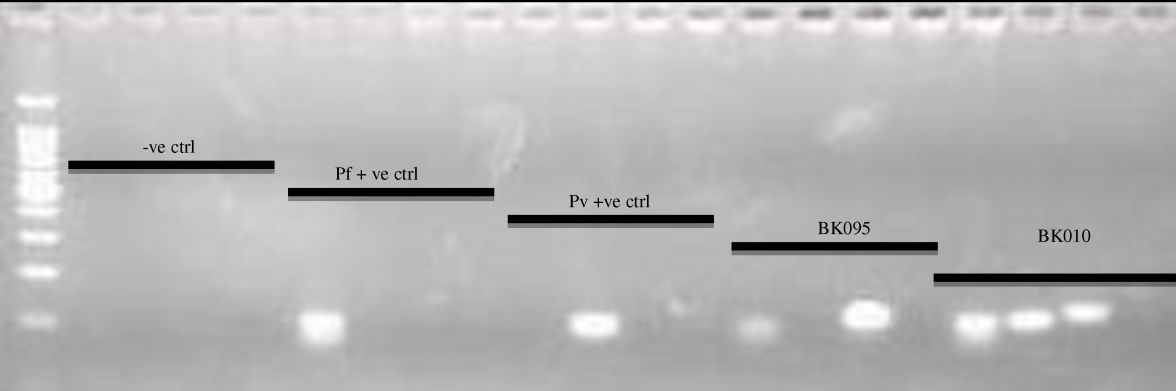

Supplement: MOESM2 [file 9545322]
